# Supplementary material
Source: PubMed Central journal article supplement (PMC4216770)

Figure S2

**(a)** Strain: BamA<sub>WT</sub>(chr) / BamA<sub>WT-His</sub>(pZS21)

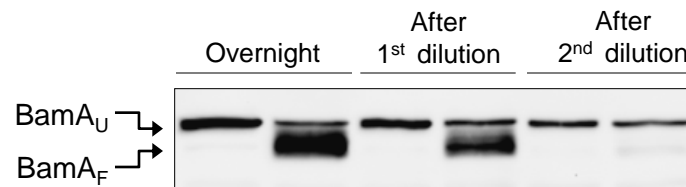

**(b)** Strain: BamA<sub>F474L</sub>(chr) / BamA<sub>WT-His</sub>(pZS21)

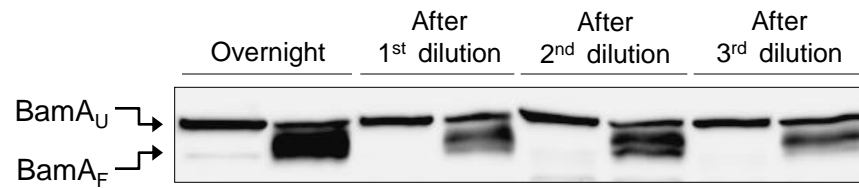

Supplement: NIHMS602009-supplement-02.pdf [file NIHMS602009-supplement-02.pdf]
