# Supplementary material
Source: PubMed Central journal article supplement (PMC4216770)

Figure S1

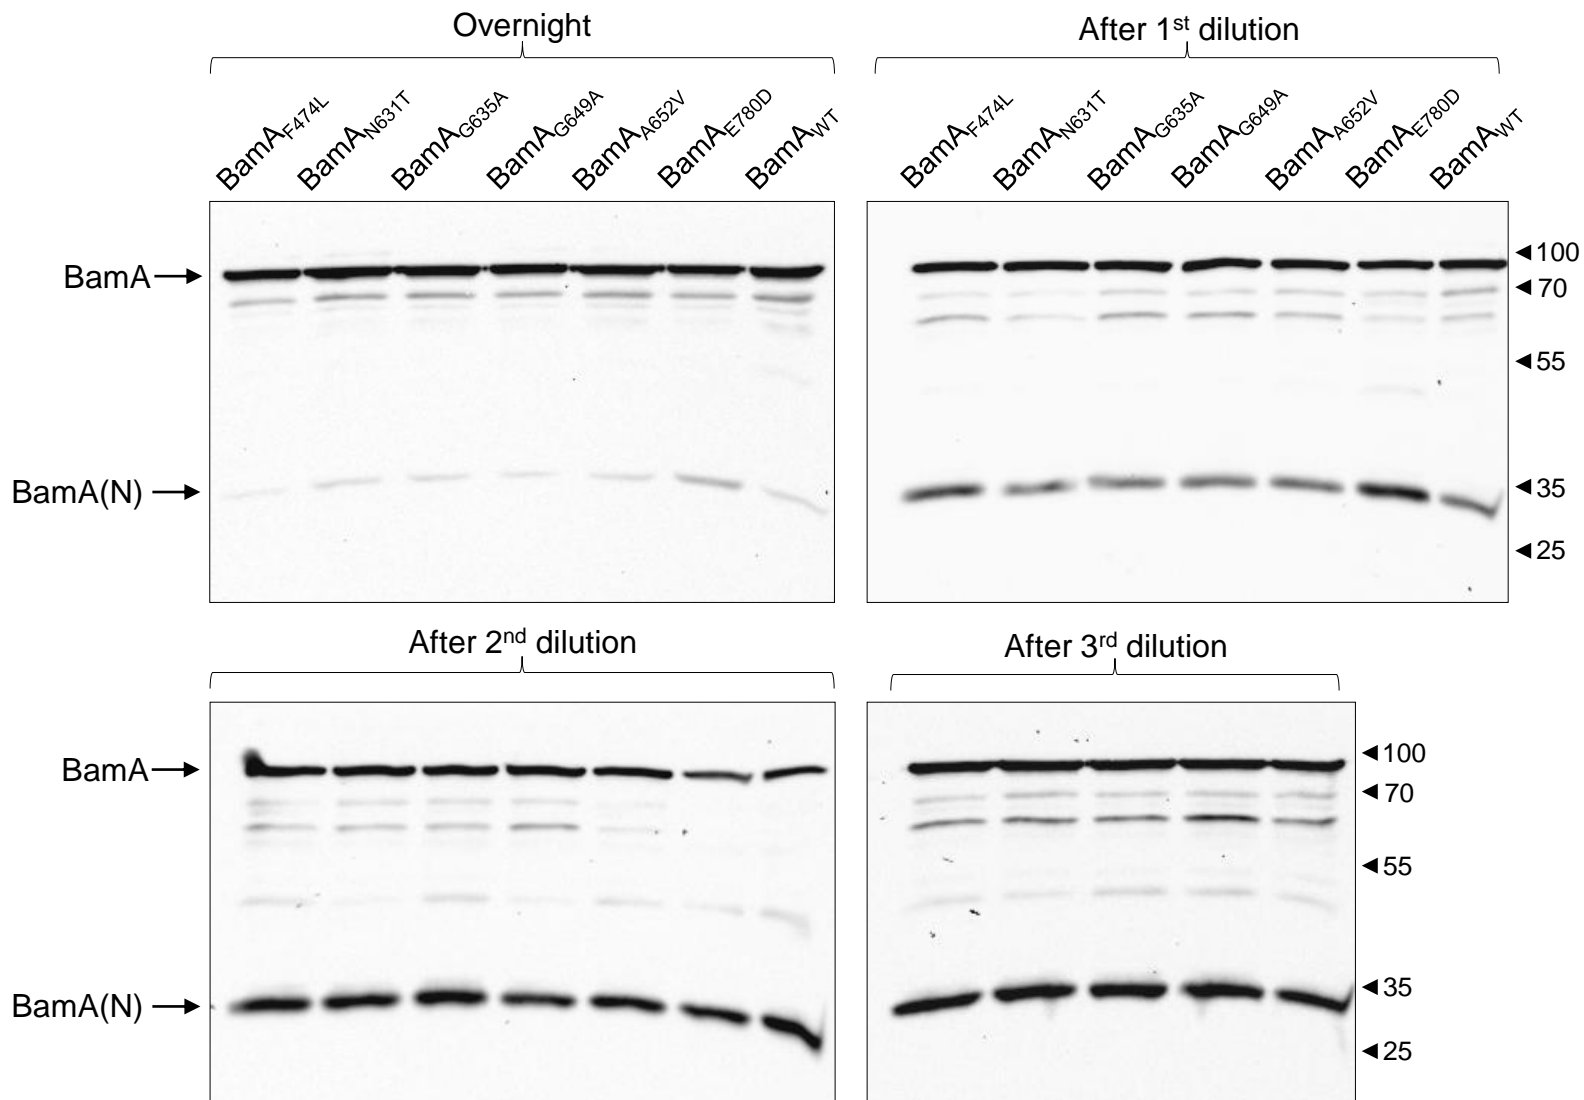

Supplement: NIHMS602009-supplement-01.pdf [file NIHMS602009-supplement-01.pdf]

Figure S3

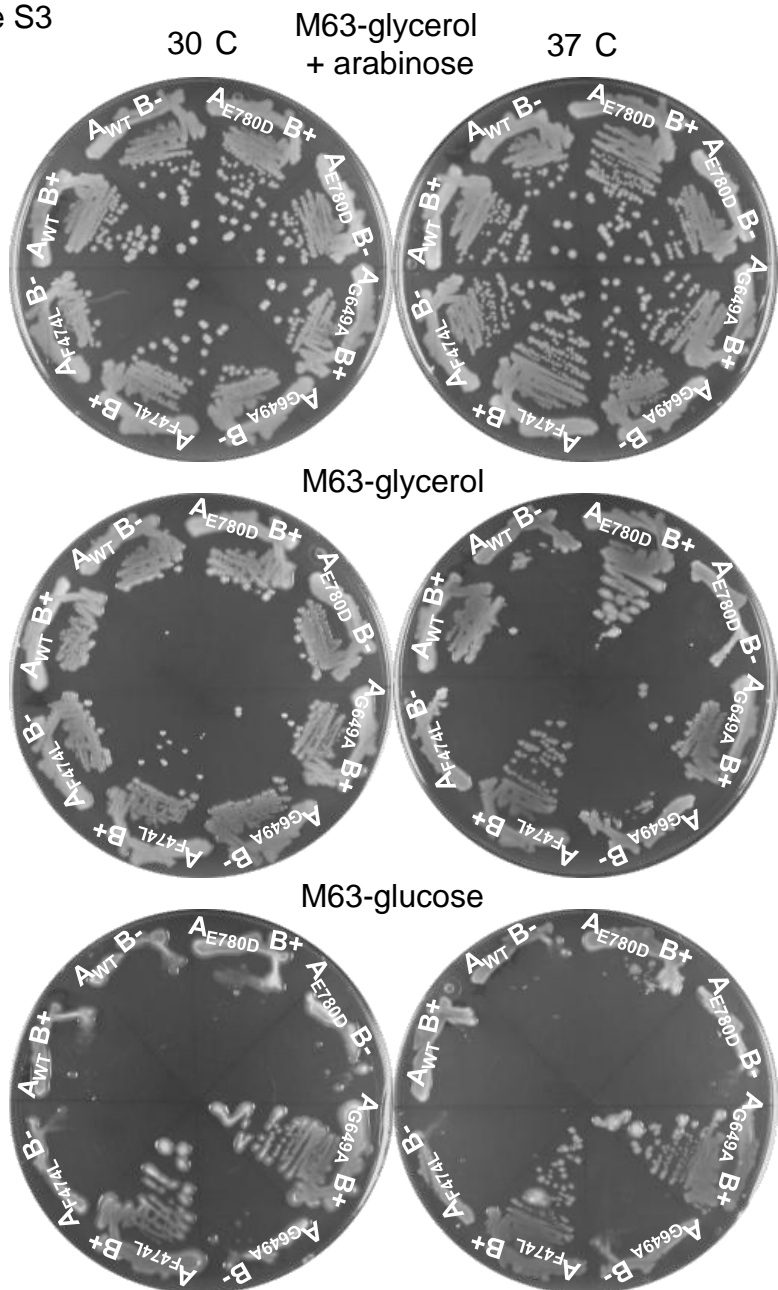

Supplement: NIHMS602009-supplement-03.pdf [file NIHMS602009-supplement-03.pdf]
